# Supplementary material
Source: publisher figshare collection journal article supplement (https://acs.figshare.com/ndownloader/files/14162417)
Supplement: Supplementary file 1 [file 14162417]

**Supporting Information**

***Critical Features for Mesoporous Silica***

***Nanoparticles Encapsulated into Erythrocytes***

*Zih-An Chen*<sup>1</sup>, *Si-Han Wu*<sup>2,3</sup>, *Peilin Chen*<sup>4</sup>, *Yi-Ping Chen*<sup>\*,2,3</sup> and *Chung-Yuan Mou*<sup>\*,1,2</sup>

<sup>1</sup>Department of Chemistry, National Taiwan University, No. 1, Sec. 4, Roosevelt Road, Taipei 10617, Taiwan <sup>2</sup>Graduate Institute of Nanomedicine and Medical Engineering, Taipei Medical University, No. 250, Wu Xinyi Street, Taipei 11031, Taiwan.

<sup>3</sup>International PhD Program in Biomedical Engineering, College of Biomedical Engineering, Taipei Medical University, Taipei 11031, Taiwan <sup>4</sup>Research Center for Applied Sciences, Academia Sinica, 128 Sec. 2, Academia Rd., Nankang, Taipei 11529, Taiwan.

E-mail: cymou@ntu.edu.tw

**Figure S1**

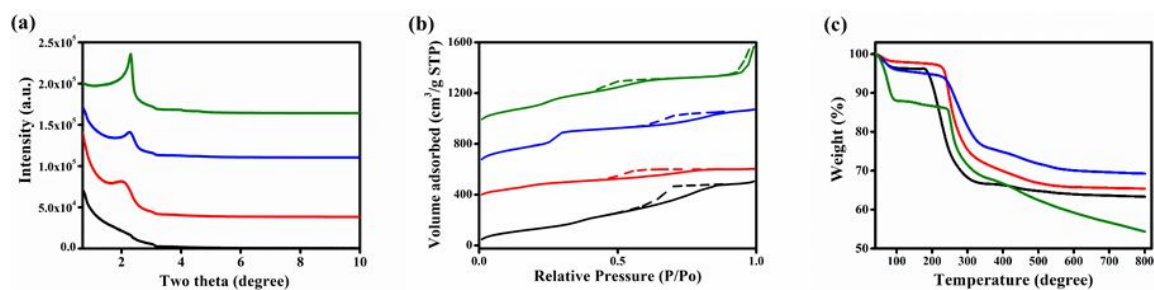

**Figure S1.** (a) X-ray diffraction (XRD) patterns, (b) Linear plot of the nitrogen sorption isotherms and (c) Thermogravimetric analysis (TGA) of RMSN-10 (black), RMSN-PEG-25 (red), RMSN-PEG-50 (blue) and RMSN-PEG-200 (green).

**Table S1** Total surface area, interplanar spacing, pore size and weight loss of RMSN-PEG with various sizes.

| Samples      | $d_{100}$ (nm) | $S_{\text{BET}}$ (m <sup>2</sup> /g) | $D_{\text{BJH}}$ (nm) | TGA results for<br>150-800°C (wt%) |
|--------------|----------------|--------------------------------------|-----------------------|------------------------------------|
| Bare-RMSN-10 | 4.87           | 610.49                               | 2.72                  | 32.8%                              |
| RMSN-PEG-25  | 5.27           | 470.25                               | 1.62                  | 32.3%                              |
| RMSN-PEG-50  | 4.83           | 887.02                               | 2.07                  | 26.0%                              |
| RMSN-PEG-200 | 4.83           | 793.73                               | 1.93                  | 33.0%                              |

$d_{100}$ : interplanar spacing calculating from Bragg formulation.  $S_{\text{BET}}$ : surface area calculated from data using BET equation.  $D_{\text{BJH}}$ : pore diameter assigned from the maximum on the BJH pore size distribution. wt%: normalized weight loss from TGA analysis. Bare means particles without PEGylation.

**Figure S2**

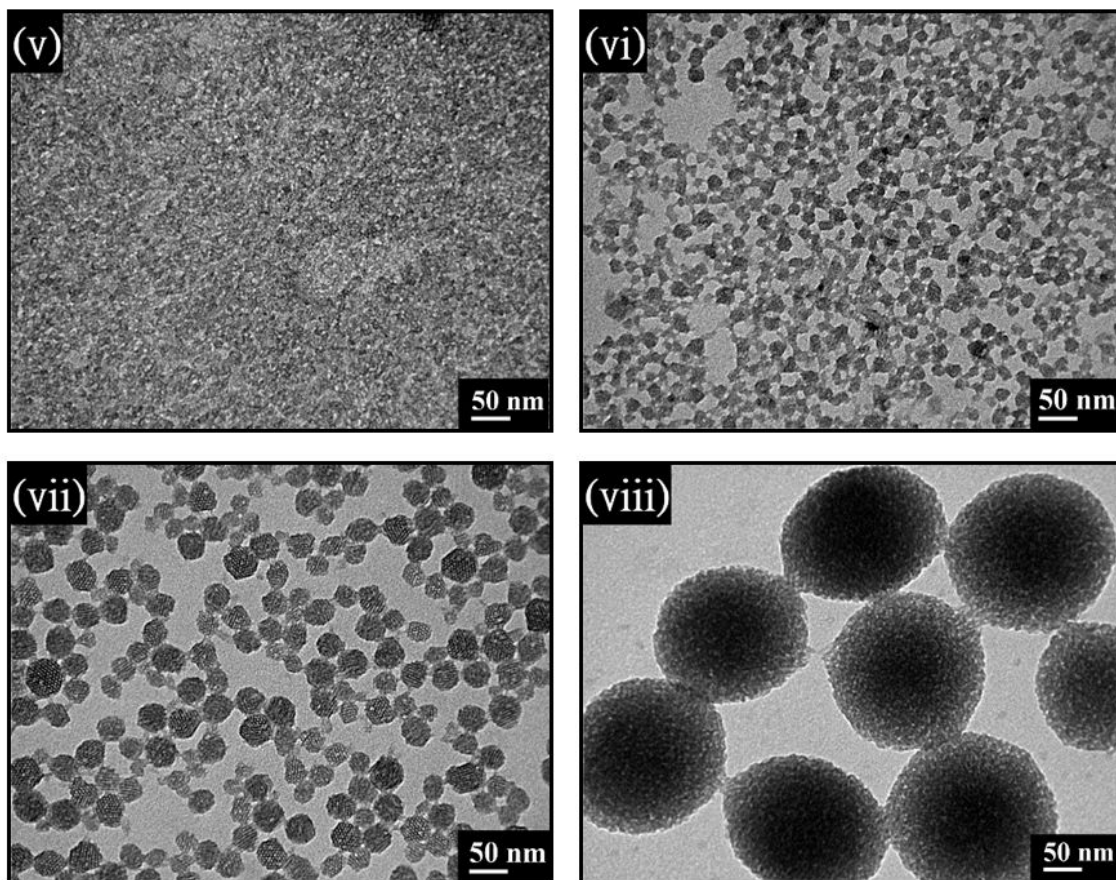

**Figure S2.** TEM imaging of MSN-PEG with various diameters: (v) MSN-PEG-10, (vi) MSN-PEG-25, (vii) MSN-PEG-50 and (viii) MSN-PEG-200.

**Table S2** Hydrodynamic size distribution and zeta potential of MSN-PEG, RMSN-PEG and surface-modified MSN with various sizes in different solvent (including of DI water, PBS and HEPES buffer).

| Samples         | D <sub>h</sub> / PdI<br>in DI water<br>(nm) | D <sub>h</sub> / PdI<br>in PBS (nm) | D <sub>h</sub> / PdI<br>in HEPES<br>buffer (nm) | ζ in HEPES<br>buffer (mV) |
|-----------------|---------------------------------------------|-------------------------------------|-------------------------------------------------|---------------------------|
| Bare-MSN-10     | N/A                                         | N/A                                 | -                                               | -7.1 ± 0.8                |
| MSN-PEG-10      | 17.3 / 0.52                                 | 20.9 / 0.38                         | -                                               | -1.6 ± 0.7                |
| MSN-PEG-25      | 29.0 / 0.21                                 | 32.5 / 0.23                         | -                                               | -1.0 ± 2.1                |
| MSN-PEG-50      | 50.1 / 0.22                                 | 48.7 / 0.06                         | -                                               | -1.4 ± 0.3                |
| MSN-PEG-200     | 205.0 / 0.04                                | 215.8 / 0.01                        | -                                               | -2.5 ± 0.2                |
| Bare-RMSN-10    | N/A                                         | N/A                                 | N/A                                             | -12.1 ± 2.0               |
| RMSN-PEG-10     | 27.2 / 0.35                                 | 18.5 / 0.29                         | 26.4 / 0.54 *                                   | -1.6 ± 1.2                |
| RMSN-PEG-25     | 34.4 / 0.23                                 | 32.7 / 0.15                         | 38.8 / 0.20                                     | -1.3 ± 0.5                |
| RMSN-PEG-50     | 58.8 / 0.13                                 | 56.3 / 0.09                         | 49.6 / 0.08                                     | -1.3 ± 0.3                |
| RMSN-PEG-200    | 192.5 / 0.03                                | 206.4 / 0.03                        | 215.2 / 0.06                                    | -2.7 ± 0.02               |
| RMSN-PEG-TA-10  | 38.4 / 0.66                                 | 23.8 / 0.42                         | 54.3 / 0.41 *                                   | 0.4 ± 0.07                |
| RMSN-PEG-PEI-10 | 31.2 / 0.31                                 | 27.2 / 0.30                         | 47.9 / 0.20 *                                   | 0.7 ± 0.46                |

D<sub>h</sub> = Z-average, harmonic intensity averaged particle diameter, PdI = polydispersity index. ζ = Zeta potential. \* means multi-peak distribution. Bare means particles without PEGylation. R represents RITC dye reagent. TA = TA-silane, PEI = PEI-silane. N/A = not applicable.

Figure S3

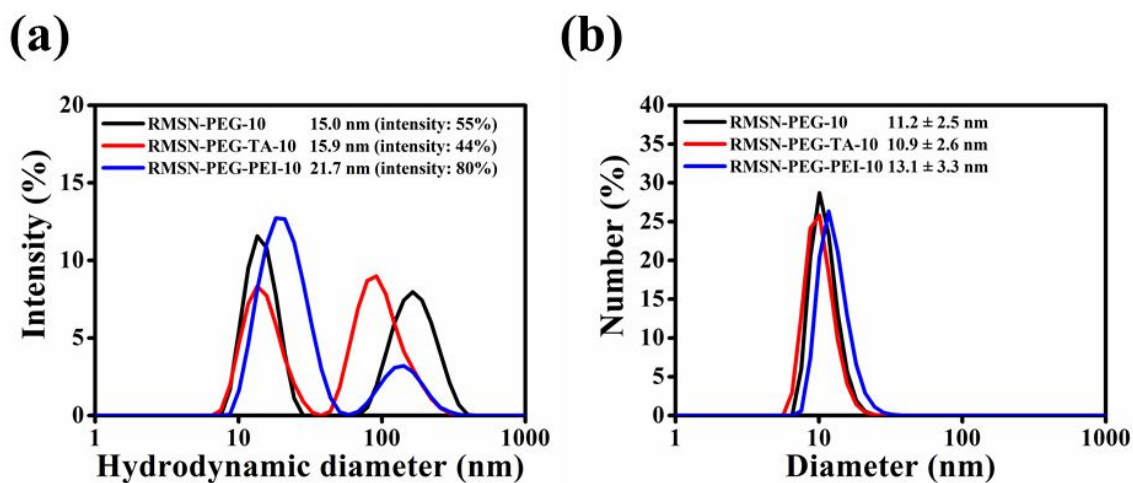

**Figure S3.** (a) Hydrodynamic diameter intensity distributions and (b) number distribution of RMSN-PEG-10 (black), RMSN-PEG-TA-10 (red) and RMSN-PEG-PEI-10 (blue) in HEPES buffer.

**Figure S4**

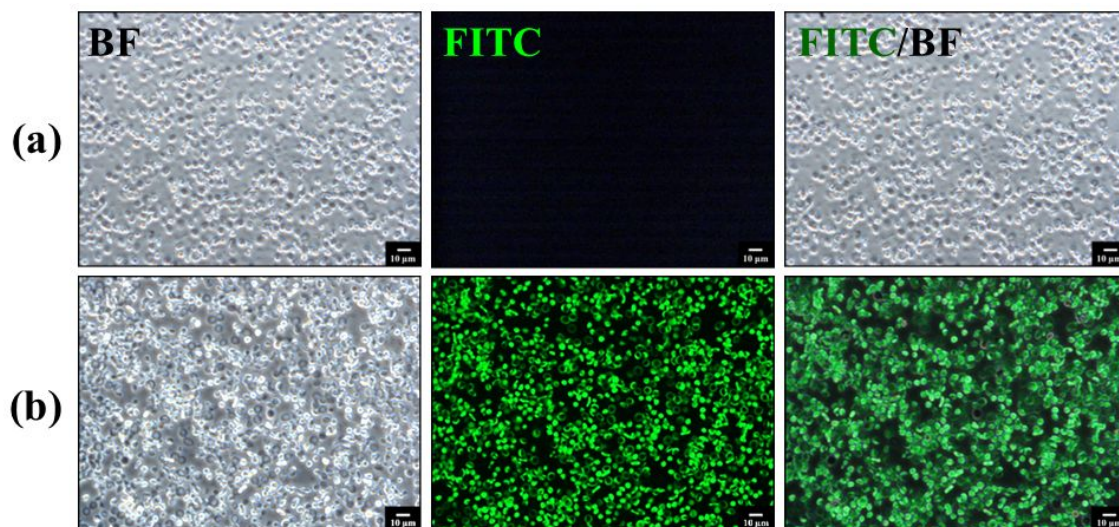

**Figure S4.** Optical and fluorescent imaging of (a) native RBCs and (b) the dextran@RBCs. BF: bright field, FITC: detecting fluorescent RBCs and FITC/BF: merge BF and FITC imaging. All of the images were taken at 40× original magnification.

**Figure S5**

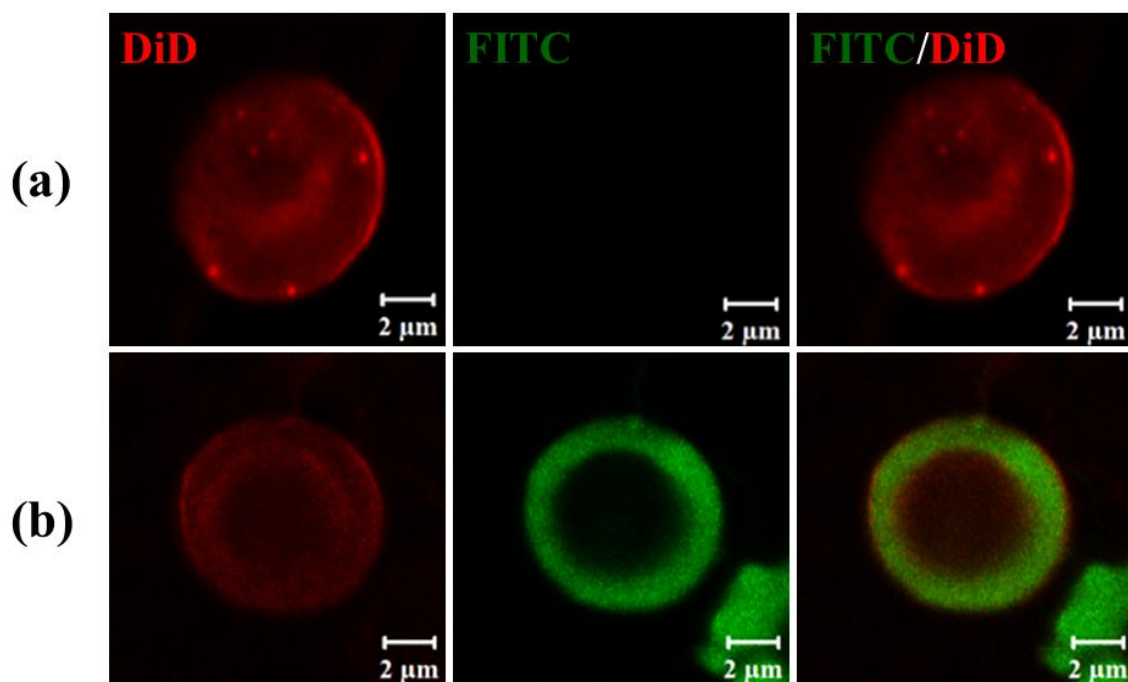

**Figure S5.** Confocal imaging of (a) native RBCs and (b) dextran@RBCs with DiD dye reagent. DiD: fluorescent membrane of RBCs, FITC: detecting FITC dye reagent and FITC/DiD: merge FITC and DiD imaging.

**Figure S6**

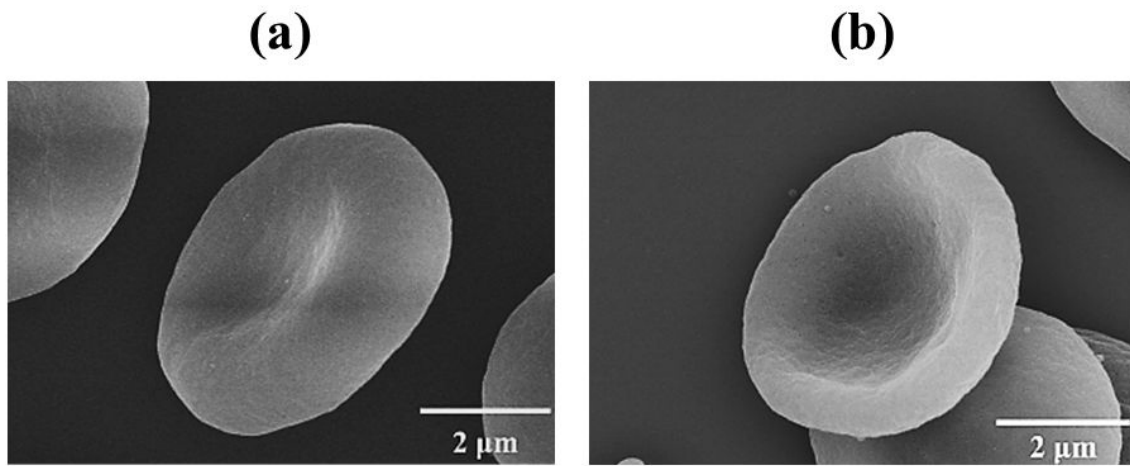

**Figure S6.** Scanning electron microscopy (SEM) imaging of (a) native RBCs and (b) the dextran@RBCs.

**Figure S7**

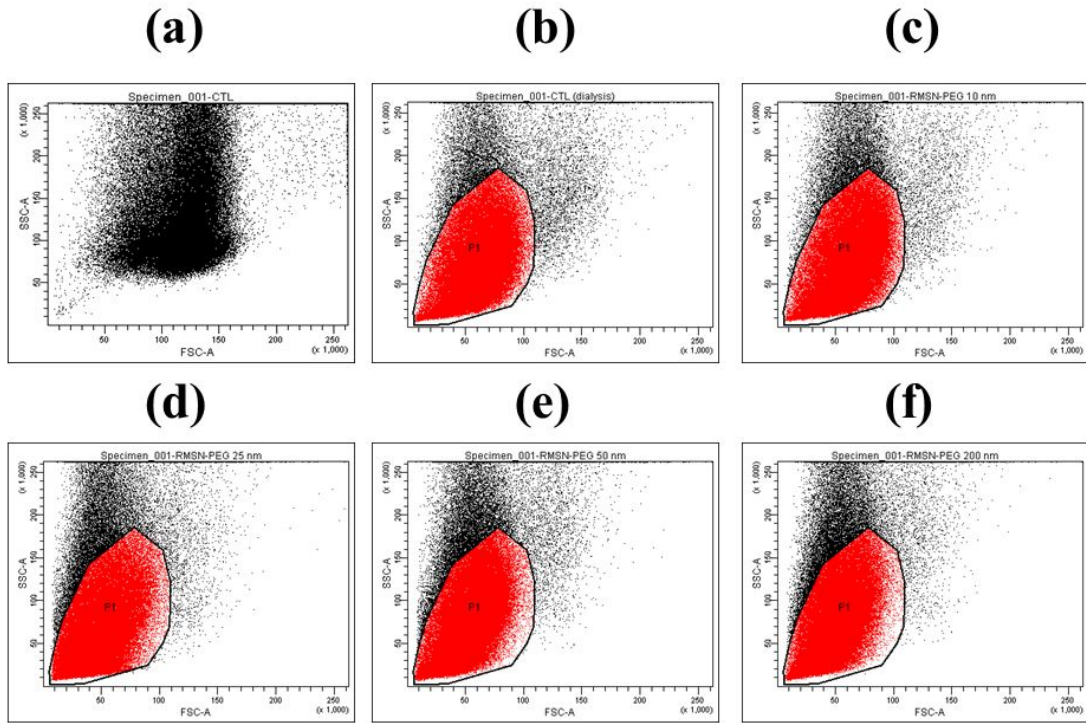

**Figure S7.** The FSC (X-axis) and SSC (Y-axis) parameters on flow cytometry determine the relative size and internal complexity of RBCs, which were processed via hypotonic dialysis based method. (a) Native RBCs, (b) dialyzed RBCs and (c-f) the engineered RMSN-RBCs. P1 meant the red area acted as control of the flow cytometry analysis for the engineered RMSN-RBCs shown in Fig 7a.

**Table S3** Cell integrity evaluation of the engineered RMSN-RBCs measured with an automated hemocytometer.

| Samples       | MCV (fl)        | MCH (pg)       | MCHC (g/dl)    |
|---------------|-----------------|----------------|----------------|
| Native RBCs   | 101.5 $\pm$ 0.6 | 28.7 $\pm$ 1.8 | 28.2 $\pm$ 1.8 |
| Dialyzed RBCs | 53.8 $\pm$ 4.5  | 10.7 $\pm$ 0.9 | 20.0 $\pm$ 3.2 |
| RMSN-RBC-10   | 53.0 $\pm$ 3.0  | 10.9 $\pm$ 0.9 | 20.5 $\pm$ 1.0 |
| RMSN-RBC-25   | 53.1 $\pm$ 1.0  | 11.5 $\pm$ 0.9 | 21.6 $\pm$ 2.1 |
| RMSN-RBC-50   | 51.9 $\pm$ 1.4  | 9.6 $\pm$ 0.2  | 18.5 $\pm$ 0.9 |
| RMSN-RBC-200  | 43.7 $\pm$ 0.6  | 10.9 $\pm$ 0.2 | 24.9 $\pm$ 0.2 |

The results are means of three experiments  $\pm$  standard deviation. MCV, MCH and MCHC were measured with an automated hemocytometer. MCH: Mean hemoglobin concentration; MCHC: Mean corpuscular hemoglobin concentration; MCV: Mean corpuscular volume; RBC: Red blood cell; Native RBCs: Not dialyzed red blood cells; Dialyzed RBCs: Red blood cell via hypotonic dialysis based method; RMSN-RBC-(10 to 200): the engineered RMSN-RBCs with various size of RMSN.

**Table S4** Si content determined by ICP-MS analysis. The Delta Si values correspond to the values obtained by subtracting the Si content of native RBCs from the Si content of the engineered RMSN-RBCs ( $10^8$  cells).

| Samples      | Si ( $\mu\text{g/mL}$ ) | Delta Si ( $\mu\text{g/mL}$ ) | SiO <sub>2</sub> (pg/cell) |
|--------------|-------------------------|-------------------------------|----------------------------|
| Native RBCs  | 8.39                    | 0                             | 0                          |
| RMSN-RBC-10  | 12.40                   | 4.01                          | 0.085                      |
| RMSN-RBC-25  | 10.47                   | 2.08                          | 0.044                      |
| RMSN-RBC-50  | 9.93                    | 1.54                          | 0.032                      |
| RMSN-RBC-200 | N/A                     | N/A                           | N/A                        |

The results are determined by ICP-MS analysis. RBC: Red blood cell; Native RBCs: Not dialyzed red blood cells; RMSN-RBC-(10 to 200): the engineered RMSN-RBCs with various size of RMSNs. N/A = not applicable.

**Figure S8**

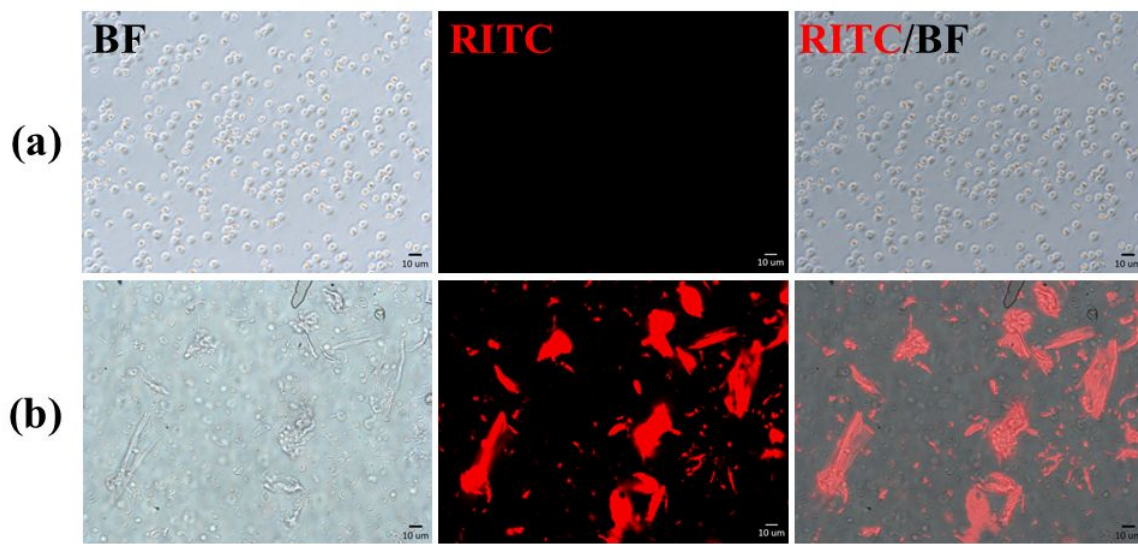

**Figure S8.** Optical and fluorescent imaging of the engineered RMSN-RBCs (mouse RBC), which is (a) native mRBCs and (b) RMSN-mRBC-50. From left to right of imaging channel, BF: bright field, RITC: detecting the RBCs containing RITC dye-containing particles and RITC/BF: merge BF and RITC imaging. All of the images were taken at 40× original magnification.
